# Supplementary material for: The paradox of plant preference: the malaria vectors Anopheles gambiae and Anopheles coluzzii select suboptimal food sources for their survival and reproduction
Source: Research Square preprint supplement (doi:10.21203/rs.3.rs-3324716/v1), 2023-09-26
Supplement: Supplementary file 1 [file dbcf44da367b14cbc88998fb.pdf]

## Reporting Summary

Nature Portfolio wishes to improve the reproducibility of the work that we publish. This form provides structure for consistency and transparency in reporting. For further information on Nature Portfolio policies, see our [Editorial Policies](#) and the [Editorial Policy Checklist](#).

Please do not complete any field with "not applicable" or n/a. Refer to the help text for what text to use if an item is not relevant to your study.

For final submission: please carefully check your responses for accuracy; you will not be able to make changes later.

### Statistics

For all statistical analyses, confirm that the following items are present in the figure legend, table legend, main text, or Methods section.

n/a Confirmed

- |                          |                                     |                                                                                                                                                                                                                                                            |
|--------------------------|-------------------------------------|------------------------------------------------------------------------------------------------------------------------------------------------------------------------------------------------------------------------------------------------------------|
| <input type="checkbox"/> | <input checked="" type="checkbox"/> | The exact sample size ( $n$ ) for each experimental group/condition, given as a discrete number and unit of measurement                                                                                                                                    |
| <input type="checkbox"/> | <input checked="" type="checkbox"/> | A statement on whether measurements were taken from distinct samples or whether the same sample was measured repeatedly                                                                                                                                    |
| <input type="checkbox"/> | <input checked="" type="checkbox"/> | The statistical test(s) used AND whether they are one- or two-sided<br><i>Only common tests should be described solely by name; describe more complex techniques in the Methods section.</i>                                                               |
| <input type="checkbox"/> | <input checked="" type="checkbox"/> | A description of all covariates tested                                                                                                                                                                                                                     |
| <input type="checkbox"/> | <input checked="" type="checkbox"/> | A description of any assumptions or corrections, such as tests of normality and adjustment for multiple comparisons                                                                                                                                        |
| <input type="checkbox"/> | <input checked="" type="checkbox"/> | A full description of the statistical parameters including central tendency (e.g. means) or other basic estimates (e.g. regression coefficient) AND variation (e.g. standard deviation) or associated estimates of uncertainty (e.g. confidence intervals) |
| <input type="checkbox"/> | <input checked="" type="checkbox"/> | For null hypothesis testing, the test statistic (e.g. $F$ , $t$ , $r$ ) with confidence intervals, effect sizes, degrees of freedom and $P$ value noted<br><i>Give <math>P</math> values as exact values whenever suitable.</i>                            |
| <input type="checkbox"/> | <input type="checkbox"/>            | For Bayesian analysis, information on the choice of priors and Markov chain Monte Carlo settings                                                                                                                                                           |
| <input type="checkbox"/> | <input checked="" type="checkbox"/> | For hierarchical and complex designs, identification of the appropriate level for tests and full reporting of outcomes                                                                                                                                     |
| <input type="checkbox"/> | <input type="checkbox"/>            | Estimates of effect sizes (e.g. Cohen's $d$ , Pearson's $r$ ), indicating how they were calculated                                                                                                                                                         |

Our web collection on [statistics for biologists](#) contains articles on many of the points above.

### Software and code

Policy information about [availability of computer code](#)

Data collection **Data collected on excell version 2016**

Data analysis **R software (version 4.0.5) was used to analyse the data, and codes will be available before publication**

For manuscripts utilizing custom algorithms or software that are central to the research but not yet described in published literature, software must be made available to editors and reviewers. We strongly encourage code deposition in a community repository (e.g. GitHub). See the Nature Portfolio [guidelines for submitting code & software](#) for further information.

### Data

Policy information about [availability of data](#)

All manuscripts must include a [data availability statement](#). This statement should provide the following information, where applicable:

- Accession codes, unique identifiers, or web links for publicly available datasets
- A description of any restrictions on data availability
- For clinical datasets or third party data, please ensure that the statement adheres to our [policy](#)

**Data will be available on IRD dataverse and a link will be provided before publication.**

## Research involving human participants, their data, or biological material

Policy information about studies with [human participants or human data](#). See also policy information about [sex, gender \(identity/presentation\), and sexual orientation](#) and [race, ethnicity and racism](#).

|                                                                    |                |
|--------------------------------------------------------------------|----------------|
| Reporting on sex and gender                                        | not applicable |
| Reporting on race, ethnicity, or other socially relevant groupings | not applicable |
| Population characteristics                                         | not applicable |
| Recruitment                                                        | not applicable |
| Ethics oversight                                                   | not applicable |

Note that full information on the approval of the study protocol must also be provided in the manuscript.

## Field-specific reporting

Please select the one below that is the best fit for your research. If you are not sure, read the appropriate sections before making your selection.

☐ Life sciences ☐ Behavioural & social sciences ☒ Ecological, evolutionary & environmental sciences

For a reference copy of the document with all sections, see [nature.com/documents/nr-reporting-summary-flat.pdf](https://www.nature.com/documents/nr-reporting-summary-flat.pdf)

## Life sciences study design

All studies must disclose on these points even when the disclosure is negative.

|                 |                |
|-----------------|----------------|
| Sample size     | not applicable |
| Data exclusions | not applicable |
| Replication     | not applicable |
| Randomization   | not applicable |
| Blinding        | not applicable |

## Behavioural & social sciences study design

All studies must disclose on these points even when the disclosure is negative.

|                   |                |
|-------------------|----------------|
| Study description | not applicable |
| Research sample   | not applicable |
| Sampling strategy | not applicable |
| Data collection   | not applicable |
| Timing            | not applicable |
| Data exclusions   | not applicable |
| Non-participation | not applicable |
| Randomization     | not applicable |

# Ecological, evolutionary & environmental sciences study design

All studies must disclose on these points even when the disclosure is negative.

|                          |                                                                                                       |
|--------------------------|-------------------------------------------------------------------------------------------------------|
| Study description        | Experimental laboratory study                                                                         |
| Research sample          | Mosquitoes                                                                                            |
| Sampling strategy        | We used mosquitoes bred in the laboratoryry mosquitoes                                                |
| Data collection          | activation, attractivité, etc.                                                                        |
| Timing and spatial scale | The study took place from August-September 2020 and in October 2021, in Bobo-Dioulasso, Burkina Faso. |
| Data exclusions          | not applicable                                                                                        |
| Reproducibility          | The study was repeated 16 times and is reproducible.                                                  |
| Randomization            | not applicable                                                                                        |
| Blinding                 | not applicable                                                                                        |

Did the study involve field work? ☒ Yes ☐ No

## Field work, collection and transport

|                        |                                                                   |
|------------------------|-------------------------------------------------------------------|
| Field conditions       | accessible field                                                  |
| Location               | City of Bobo-Dioulasso and the village of Farako-ba, Burkina Faso |
| Access & import/export | via a motorbike                                                   |
| Disturbance            | No disturbance                                                    |

## Reporting for specific materials, systems and methods

We require information from authors about some types of materials, experimental systems and methods used in many studies. Here, indicate whether each material, system or method listed is relevant to your study. If you are not sure if a list item applies to your research, read the appropriate section before selecting a response.

### Materials & experimental systems

| n/a                      | Involved in the study                                  |
|--------------------------|--------------------------------------------------------|
| <input type="checkbox"/> | <input type="checkbox"/> Antibodies                    |
| <input type="checkbox"/> | <input type="checkbox"/> Eukaryotic cell lines         |
| <input type="checkbox"/> | <input type="checkbox"/> Palaeontology and archaeology |
| <input type="checkbox"/> | <input type="checkbox"/> Animals and other organisms   |
| <input type="checkbox"/> | <input type="checkbox"/> Clinical data                 |
| <input type="checkbox"/> | <input type="checkbox"/> Dual use research of concern  |
| <input type="checkbox"/> | <input checked="" type="checkbox"/> Plants             |

### Methods

| n/a                      | Involved in the study                           |
|--------------------------|-------------------------------------------------|
| <input type="checkbox"/> | <input type="checkbox"/> ChIP-seq               |
| <input type="checkbox"/> | <input type="checkbox"/> Flow cytometry         |
| <input type="checkbox"/> | <input type="checkbox"/> MRI-based neuroimaging |

## Antibodies

|                 |                |
|-----------------|----------------|
| Antibodies used | not applicable |
| Validation      | not applicable |

## Eukaryotic cell lines

Policy information about [cell lines and Sex and Gender in Research](#)

|                                                                      |                |
|----------------------------------------------------------------------|----------------|
| Cell line source(s)                                                  | not applicable |
| Authentication                                                       | not applicable |
| Mycoplasma contamination                                             | not applicable |
| Commonly misidentified lines<br>(See <a href="#">ICLAC</a> register) | not applicable |

## Palaeontology and Archaeology

|                                                                                                                                                 |                |
|-------------------------------------------------------------------------------------------------------------------------------------------------|----------------|
| Specimen provenance                                                                                                                             | not applicable |
| Specimen deposition                                                                                                                             | not applicable |
| Dating methods                                                                                                                                  | not applicable |
| <input type="checkbox"/> Tick this box to confirm that the raw and calibrated dates are available in the paper or in Supplementary Information. |                |
| Ethics oversight                                                                                                                                | not applicable |

Note that full information on the approval of the study protocol must also be provided in the manuscript.

## Animals and other research organisms

Policy information about [studies involving animals; ARRIVE guidelines](#) recommended for reporting animal research, and [Sex and Gender in Research](#)

|                         |                                                                           |
|-------------------------|---------------------------------------------------------------------------|
| Laboratory animals      | Mosquitoes and rabbit                                                     |
| Wild animals            | not applicable                                                            |
| Reporting on sex        | Males and females mosquitoes                                              |
| Field-collected samples | Flowers of plants                                                         |
| Ethics oversight        | Burkina Faso ethics approval; IRB registration #00004738 and FWA 00007038 |

Note that full information on the approval of the study protocol must also be provided in the manuscript.

## Clinical data

Policy information about [clinical studies](#)

All manuscripts should comply with the ICMJE [guidelines for publication of clinical research](#) and a completed [CONSORT checklist](#) must be included with all submissions.

|                             |                              |
|-----------------------------|------------------------------|
| Clinical trial registration | not applicable               |
| Study protocol              | not applicable               |
| Data collection             | not applicable               |
| Outcomes                    | not applicablenot applicable |

## Dual use research of concern

Policy information about [dual use research of concern](#)

### Hazards

Could the accidental, deliberate or reckless misuse of agents or technologies generated in the work, or the application of information presented in the manuscript, pose a threat to:

| No                       | Yes                                                 |
|--------------------------|-----------------------------------------------------|
| <input type="checkbox"/> | <input type="checkbox"/> Public health              |
| <input type="checkbox"/> | <input type="checkbox"/> National security          |
| <input type="checkbox"/> | <input type="checkbox"/> Crops and/or livestock     |
| <input type="checkbox"/> | <input type="checkbox"/> Ecosystems                 |
| <input type="checkbox"/> | <input type="checkbox"/> Any other significant area |

## Experiments of concern

Does the work involve any of these experiments of concern:

| No                       | Yes                                                                                                  |
|--------------------------|------------------------------------------------------------------------------------------------------|
| <input type="checkbox"/> | <input type="checkbox"/> Demonstrate how to render a vaccine ineffective                             |
| <input type="checkbox"/> | <input type="checkbox"/> Confer resistance to therapeutically useful antibiotics or antiviral agents |
| <input type="checkbox"/> | <input type="checkbox"/> Enhance the virulence of a pathogen or render a nonpathogen virulent        |
| <input type="checkbox"/> | <input type="checkbox"/> Increase transmissibility of a pathogen                                     |
| <input type="checkbox"/> | <input type="checkbox"/> Alter the host range of a pathogen                                          |
| <input type="checkbox"/> | <input type="checkbox"/> Enable evasion of diagnostic/detection modalities                           |
| <input type="checkbox"/> | <input type="checkbox"/> Enable the weaponization of a biological agent or toxin                     |
| <input type="checkbox"/> | <input type="checkbox"/> Any other potentially harmful combination of experiments and agents         |

## Plants

|                       |                                                |
|-----------------------|------------------------------------------------|
| Seed stocks           | not applicable                                 |
| Novel plant genotypes | not applicable                                 |
| Authentication        | All plant species were identified by botanists |

## ChIP-seq

### Data deposition

- ☐ Confirm that both raw and final processed data have been deposited in a public database such as [GEO](#).
- ☐ Confirm that you have deposited or provided access to graph files (e.g. BED files) for the called peaks.

|                                                                    |                |
|--------------------------------------------------------------------|----------------|
| Data access links<br><i>May remain private before publication.</i> | not applicable |
| Files in database submission                                       | not applicable |
| Genome browser session<br>(e.g. <a href="#">UCSC</a> )             | not applicable |

### Methodology

|                         |                |
|-------------------------|----------------|
| Replicates              | not applicable |
| Sequencing depth        | not applicable |
| Antibodies              | not applicable |
| Peak calling parameters | not applicable |
| Data quality            | not applicable |
| Software                | not applicable |

## Flow Cytometry

### Plots

Confirm that:

- ☐ The axis labels state the marker and fluorochrome used (e.g. CD4-FITC).
- ☐ The axis scales are clearly visible. Include numbers along axes only for bottom left plot of group (a 'group' is an analysis of identical markers).
- ☐ All plots are contour plots with outliers or pseudocolor plots.
- ☐ A numerical value for number of cells or percentage (with statistics) is provided.

### Methodology

|                           |                |
|---------------------------|----------------|
| Sample preparation        | not applicable |
| Instrument                | not applicable |
| Software                  | not applicable |
| Cell population abundance | not applicable |
| Gating strategy           | not applicable |

☐ Tick this box to confirm that a figure exemplifying the gating strategy is provided in the Supplementary Information.

## Magnetic resonance imaging

### Experimental design

|                                 |                                                                 |
|---------------------------------|-----------------------------------------------------------------|
| Design type                     | not applicable                                                  |
| Design specifications           | not applicable                                                  |
| Behavioral performance measures | not applicable                                                  |
| Imaging type(s)                 | not applicable                                                  |
| Field strength                  | not applicable                                                  |
| Sequence & imaging parameters   | not applicable                                                  |
| Area of acquisition             | not applicable                                                  |
| Diffusion MRI                   | <input type="checkbox"/> Used <input type="checkbox"/> Not used |

### Preprocessing

|                            |                |
|----------------------------|----------------|
| Preprocessing software     | not applicable |
| Normalization              | not applicable |
| Normalization template     | not applicable |
| Noise and artifact removal | not applicable |
| Volume censoring           | not applicable |

### Statistical modeling & inference

|                           |                                                                                                       |
|---------------------------|-------------------------------------------------------------------------------------------------------|
| Model type and settings   | not applicable                                                                                        |
| Effect(s) tested          | not applicable                                                                                        |
| Specify type of analysis: | <input type="checkbox"/> Whole brain <input type="checkbox"/> ROI-based <input type="checkbox"/> Both |

Statistic type for inference

not applicable

(See [Eklund et al. 2016](#))

Correction

not applicable

## Models & analysis

n/a | Involved in the study

☐ ☐ Functional and/or effective connectivity☐ ☐ Graph analysis☐ ☐ Multivariate modeling or predictive analysis

Functional and/or effective connectivity

not applicable

Graph analysis

not applicable

Multivariate modeling and predictive analysis

not applicable
